# Supplementary material for: A novel homozygous mutation in GAD1 gene described in a schizophrenic patient impairs activity and dimerization of GAD67 enzyme
Source: PubMed Central journal article supplement (PMC6195539; doi:10.1038/s41598-018-33924-8), 2018-10-19
Supplement: 41598_2018_33924_MOESM1_ESM.pdf [file 41598_2018_33924_MOESM1_ESM.pdf]

# **A novel homozygous mutation in GAD1 gene described in a schizophrenic patient impairs activity and dimerization of GAD67 enzyme.**

Chiara Magri<sup>1\*</sup>, Edoardo Giacomuzzi<sup>1</sup>, Luca La Via<sup>1</sup>, Daniela Bonini<sup>1</sup>, Viola Ravasio<sup>1</sup>, Mohammed E.A. Elhussiny<sup>1</sup>, Flavia Orizio<sup>2</sup>, Fabrizio Gangemi<sup>3</sup>, Paolo Valsecchi<sup>4,5</sup>, Roberto Bresciani<sup>2</sup>, Alessandro Barbon<sup>1</sup>, Antonio Vita<sup>4,5</sup>, Massimo Gennarelli<sup>1,6</sup>.

## **Index**

|                              |    |
|------------------------------|----|
| Supplementary Materials..... | 3  |
| References.....              | 5  |
| Supplementary Tables.....    | 6  |
| Supplementary Figures.....   | 15 |

## Supplementary Materials

### Mouse primary cortical cultures

Mouse primary cortical cultures were prepared as previously described by <sup>1</sup>. (32). Briefly, mouse cerebral cortices from day 13.5 mouse embryos were mechanically dissociated in cold HBSS containing 10mM HEPES (Invitrogen); the cell suspension was re-suspended in serum-free Neurobasal medium (Invitrogen) supplemented with B-27 (Invitrogen), 30 U/ml penicillin (Sigma-Aldrich, St. Louis, MO, USA), 30 µg/ml streptomycin (Sigma-Aldrich) and 0.5 mM Glutamax (Invitrogen). Neurons were then plated at a density of 30,000 cells/cm<sup>2</sup> on a poly-D-lysine coating (Sigma-Aldrich) in multi-well plates. Three days after plating, 50% of medium was replaced with fresh medium; subsequently, half of medium was replaced once a week for a maximum of four weeks. MOI 5 was used to transduce primary cortical neurons, adding viral particles directly to the culture media.

Animal care was conducted conforming to institutional guidelines that are in compliance with Italian national (DL N116, GU, suppl 40, 18-2-1992) and international laws and policies (European Community Council Directive 86/609, Oja L 358, 1, December 12, 1987; National Institutes of Health Guide for the Care and Use of Laboratory Animals, US National Research Council, 1996).

### COS7 cell lines

COS7 cells were cultured at 37°C and 5% CO<sub>2</sub> in DMEM medium (Invitrogen) supplemented with 10% of heat-inactivated fetal bovine serum (FBS), 30 U/ml penicillin (Sigma-Aldrich), 30 µg/ml streptomycin (Sigma-Aldrich), 1% minimum Eagle's medium nonessential amino acids, 1 mM sodium pyruvate. MOI 5 was used to transduce COS7 cells, adding viral particles directly to the culture media.

### Magnetofection of primary cortical neurons and COS7 cells

Primary cortical cultures (DIV11) and COS7 were transfected using paramagnetic nanobeads (NeuroMag, Oz Biosciences, Marseille, France). The complete medium was replaced before magnetofection with serum-free neurobasal medium. Each plasmid was incubated with NeuroMag beads at a ratio of 1 µg:3.5 µl, in 100 µl of Neurobasal (Life Technologies) for 20 min and added drop-wise to the cultures. The cells were incubated on top of a magnetic plate (Oz Biosciences) for 20 min and the complete medium was restored after 1 h. COS7 were fixed three day after transfection. Neurons were maintained in culture until DIV14 then fixed and used for immunofluorescence experiments.

## Proximity Ligation Assay

PLA was performed accordingly to the manufacturer's instructions with minor modifications. Briefly, HEK293T cells previously plated onto glass coverslips were fixed with paraformaldehyde 4% (PFA). Each sample was permeabilized with PBS-Triton 0.3% and then incubated with the blocking solution (Roche™) for about 45 min at room temperature; the primary antibodies incubation was performed overnight at 4°C with rabbit anti-HA (SIGMA; cod. H6908) 1:250 and mouse anti-c-Myc (Santa Cruz Biotechnology; cod. SC40) 1:200. On the following day, samples were washed three times in PBS at room temperature and then cells were incubated 1h at 37°C with PLA probe containing secondary antibodies conjugated with DNA probes. After PLA probe removal, samples were washed 4 times x 10' with Buffer A (Duo-link® PLA Technology® kit) at 37°C. After a brief wash with Buffer A at 37°C, samples were incubated with ligation buffer containing oligonucleotides that hybridize to PLA probe and DNA ligase, which allows annealing between probe and oligonucleotides to form a rolling circle DNA strand. This reaction was incubated for 30 min at 37°C. Subsequently, cells were washed with Buffer A at 37°C and then incubated with amplification-detection solution containing DNA polymerase for rolling circle amplification (100 min at 37°C). Next, samples were washed four times with Buffer B (Duo-link® PLA Technology® kit) at room temperature; then coverslips were incubated for 10 min with mounting buffer containing DAPI and analyzed with a confocal microscope.

## Details on molecular dynamics

Molecular dynamics simulations of GAD67wt and mutated isoforms were performed by means of package GROMACS<sup>2,3</sup>. The initial structure for the wild-type dimer was taken from PDB entry 2OKJ. The mutant was built from the wild type, by replacing residue T131 with an alanine. The force field amber99-sb was used, with the PME method for the Coulomb interactions and a Lennard-Jones potential with a cut-off of 10 Å for the short-range interactions. The initial structure was solvated with TIP3P water in a simulation box with a minimum distance of 10 Å between solute and box boundaries. Na<sup>+</sup> and Cl<sup>-</sup> ions were added to reproduce a salt concentration of 150 mM and to neutralize the system. After energy minimization, two equilibration phases followed, at constant volume, and at constant pressure. The subsequent runs were performed at constant temperature (310 K) and pressure (1 atm). For each system, two independent 30-ns simulations were carried out. Secondary structure analysis was performed by means of DSSP (<http://swift.cmbi.ru.nl/gv/dssp>).

## References

1. Lesuisse, C. & Martin, L. J. Long-term culture of mouse cortical neurons as a model for neuronal development, aging, and death. *J. Neurobiol.* **51**, 9–23 (2002).

2. Abraham, M. J. *et al.* GROMACS: High performance molecular simulations through multi-level parallelism from laptops to supercomputers. *SoftwareX* **1–2**, 19–25 (2015).
3. Hess, B., Kutzner, C., van der Spoel, D. & Lindahl, E. GROMACS 4: Algorithms for Highly Efficient, Load-Balanced, and Scalable Molecular Simulation. *J. Chem. Theory Comput.* **4**, 435–447 (2008).

## Supplementary Tables

Supplementary Table 1. List of primers

---

| Name                    | Sequence 5'-3'                                                 |
|-------------------------|----------------------------------------------------------------|
| GAD1F                   | CTAAGAACGGTGAGGAGCAAAC                                         |
| GAD1R                   | ACCCCATACTTCAAGGTGTCTCT                                        |
| GAD67_BamHI_F           | CGGGATCCCGCCACCATGGCGTCTTCGACCCCATCTTCG                        |
| GAD67_SalI_R            | GGCGTCGACTTACAGATCCTGGCCCAGTC                                  |
| GAD67_A391G_F           | CAACTATGTCCGCAAGGCATTTGATCGCTCC                                |
| GAD67_A391G_R           | GGAGCGATCAAATGCCTTGCGGACATAGTTG                                |
| GAD67_Myc_STOP_SalI_Rev | ATTGTCGACTTACAGATCCTCTTCTGAGATGAGTTTTTGTCCAGATCCTGGCCCAGT<br>C |
| GAD67_HA_STOP_SalI_Rev  | ATTGTCGACTTAAGCGTAATCTGGAACATCGTATGGGTACAGATCCTGGCCCAGTC       |

---

**Supplementary Table 2.** List of constructs.

| Construct Name                    | Vectors                                       | Primers used for cDNA amplification | Note                     | Use                                       |
|-----------------------------------|-----------------------------------------------|-------------------------------------|--------------------------|-------------------------------------------|
| pGAD67-wt                         | pIRES-hrGFP-1 <sup>a</sup> (Agilent)          | GAD67_BamHI_F                       |                          | Enzymatic activity assay                  |
| pGAD67-mut <sup>a</sup>           |                                               | GAD67_SalI_R                        |                          |                                           |
| PRRLSIN-GAD67wt-HA                | pRRLSIN.cPPT.PGK-GFP.WPRE<br>(ADDGENE #12252) | GAD67_BamHI_F                       | GFP sequence was removed | Subcellular localization study, PLA assay |
| PRRLSIN-GAD67mut-HA <sup>a</sup>  |                                               | GAD67_HA_STOP_SalI_Rev              |                          |                                           |
| PRRLSIN-GAD67wt-Myc               |                                               | GAD67_BamHI_F                       |                          |                                           |
| PRRLSIN-GAD67mut-Myc <sup>a</sup> |                                               | GAD67_Myc_STOP_SalI_Rev             |                          |                                           |

<sup>a</sup> c.391A>G mutation was inserted using primers GAD67\_A391G\_F and GAD67\_A391G\_R

**Supplementary Table 3.** List of genes of the GABAergic system screened for homozygous mutations.

| <b>Gene Name</b> | <b>RefSeq</b>  | <b>Chromosome</b> |
|------------------|----------------|-------------------|
| <i>ABAT</i>      | NM_000663.4    | chr16             |
| <i>ADCY1</i>     | NM_001281768.1 | chr7              |
| <i>ADCY2</i>     | NM_020546.2    | chr5              |
| <i>ADCY3</i>     | NM_001320613.1 | chr2              |
| <i>ADCY4</i>     | NM_001198568.1 | chr14             |
| <i>ADCY5</i>     | NM_001199642.1 | chr3              |
| <i>ADCY6</i>     | NM_015270.4    | chr12             |
| <i>ADCY7</i>     | NM_001114.4    | chr16             |
| <i>ADCY8</i>     | NM_001115.2    | chr8              |
| <i>ADCY9</i>     | NM_001116.3    | chr16             |
| <i>ADORA1</i>    | NM_000674.2    | chr1              |
| <i>ADORA2A</i>   | NM_000675.5    | chr22             |
| <i>ADRA1A</i>    | NM_000680.3    | chr8              |
| <i>ALDH5A1</i>   | NM_001080.3    | chr6              |
| <i>ARFGEF2</i>   | NM_006420.2    | chr20             |
| <i>CA2</i>       | NM_000067.2    | chr8              |
| <i>CA7</i>       | NM_001014435.1 | chr16             |



---

|                  |                |       |
|------------------|----------------|-------|
| <i>CLSTN3</i>    | NM_014718.3    | chr12 |
| <i>CNR1</i>      | NM_001160226.1 | chr6  |
| <i>CNR2</i>      | NM_001841.2    | chr1  |
| <i>CNTNAP4</i>   | NM_001322178.1 | chr16 |
| <i>CPLX1</i>     | NM_006651.3    | chr4  |
| <i>DNAJC5</i>    | NM_025219.2    | chr20 |
| <i>DNM1</i>      | NM_001005336.2 | chr9  |
| <i>DRD2</i>      | NM_000795.3    | chr11 |
| <i>GABARAP</i>   | NM_007278.1    | chr17 |
| <i>GABARAPL1</i> | NM_031412.2    | chr12 |
| <i>GABARAPL2</i> | NM_007285.6    | chr16 |
| <i>GABBR1</i>    | NM_001319053.1 | chr6  |
| <i>GABBR2</i>    | NM_005458.7    | chr9  |
| <i>GABRA1</i>    | NM_000806.5    | chr5  |
| <i>GABRA2</i>    | NM_000807.2    | chr4  |
| <i>GABRA4</i>    | NM_000809.3    | chr4  |
| <i>GABRA5</i>    | NM_000810.3    | chr15 |
| <i>GABRA6</i>    | NM_000811.2    | chr5  |
| <i>GABRB1</i>    | NM_000812.3    | chr4  |

---

---

|               |                |       |
|---------------|----------------|-------|
| <i>GABRB2</i> | NM_000813.2    | chr5  |
| <i>GABRB3</i> | NM_000814.5    | chr15 |
| <i>GABRD</i>  | NM_000815.4    | chr1  |
| <i>GABRG1</i> | NM_173536.3    | chr4  |
| <i>GABRG2</i> | NM_000816.3    | chr5  |
| <i>GABRG2</i> | NM_000816.3    | chr5  |
| <i>GABRG3</i> | NM_001270873.1 | chr15 |
| <i>GABRG3</i> | NM_001270873.1 | chr15 |
| <i>GABRP</i>  | NM_001291985.1 | chr5  |
| <i>GABRR1</i> | NM_001256703.1 | chr6  |
| <i>GABRR2</i> | NM_002043.4    | chr6  |
| <i>GABRR3</i> | NM_001105580.2 | chr3  |
| <i>GAD1</i>   | NM_000817.2    | chr2  |
| <i>GAD2</i>   | NM_000818.2    | chr10 |
| <i>GLRB</i>   | NM_000824.4    | chr4  |
| <i>GNAI1</i>  | NM_001256414.1 | chr7  |
| <i>GNAI2</i>  | NM_001166425.1 | chr3  |
| <i>GNAI3</i>  | NM_006496.3    | chr1  |
| <i>GNAL</i>   | NM_001142339.2 | chr18 |

---

---

|                |                |       |
|----------------|----------------|-------|
| <i>GNAT3</i>   | NM_001102386.2 | chr7  |
| <i>GNB1</i>    | NM_001282538.1 | chr1  |
| <i>GNB2</i>    | NM_005273.3    | chr7  |
| <i>GNB3</i>    | NM_001297571.1 | chr12 |
| <i>GNG10</i>   | NM_001017998.3 | chr9  |
| <i>GNG12</i>   | NM_018841.5    | chr1  |
| <i>GNG2</i>    | NM_001243773.1 | chr14 |
| <i>GNG3</i>    | NM_012202.4    | chr11 |
| <i>GNG4</i>    | NM_001098721.1 | chr1  |
| <i>GNG5</i>    | NM_005274.2    | chr1  |
| <i>GNG7</i>    | NM_052847.2    | chr19 |
| <i>GNG8</i>    | NM_033258.1    | chr19 |
| <i>GNGT1</i>   | NM_021955.3    | chr7  |
| <i>GNGT2</i>   | NM_001198754.1 | chr17 |
| <i>GPR156</i>  | NM_001168271.1 | chr3  |
| <i>HAP1</i>    | NM_001079870.1 | chr17 |
| <i>HSPA8</i>   | NM_006597.5    | chr11 |
| <i>HTR1B</i>   | NM_000863.2    | chr6  |
| <i>JAKMIP1</i> | NM_001099433.1 | chr4  |

---

---

|               |                |       |
|---------------|----------------|-------|
| <i>KCNJ10</i> | NM_002241.4    | chr1  |
| <i>KCNJ12</i> | NM_021012.4    | chr17 |
| <i>KCNJ15</i> | NM_001276438.1 | chr21 |
| <i>KCNJ16</i> | NM_001270422.1 | chr17 |
| <i>KCNJ2</i>  | NM_000891.2    | chr17 |
| <i>KCNJ3</i>  | NM_001260508.1 | chr2  |
| <i>KCNJ4</i>  | NM_004981.1    | chr22 |
| <i>KCNJ5</i>  | NM_000890.3    | chr11 |
| <i>KCNJ6</i>  | NM_002240.4    | chr21 |
| <i>KCNJ9</i>  | NM_004983.2    | chr1  |
| <i>KIF5B</i>  | NM_004521.2    | chr10 |
| <i>KRAS</i>   | NM_004985.4    | chr12 |
| <i>MAF1</i>   | NM_032272.4    | chr8  |
| <i>NF1</i>    | NM_000267.3    | chr17 |
| <i>NISCH</i>  | NM_001276293.1 | chr3  |
| <i>NLGN1</i>  | NM_014932.3    | chr3  |
| <i>NLGN2</i>  | NM_020795.3    | chr17 |
| <i>NPAS4</i>  | NM_001318804.1 | chr11 |
| <i>NPS</i>    | NM_001030013.1 | chr10 |

---

---

|                |                |       |
|----------------|----------------|-------|
| <i>NPY5R</i>   | NM_001317091.1 | chr4  |
| <i>OXYR</i>    | NM_000916.3    | chr3  |
| <i>PHF24</i>   | NM_001304333.2 | chr9  |
| <i>PLCL1</i>   | NM_006226.3    | chr2  |
| <i>PLCL2</i>   | NM_001144382.1 | chr3  |
| <i>PPP2CA</i>  | NM_002715.2    | chr5  |
| <i>PRKCE</i>   | NM_005400.2    | chr2  |
| <i>PTEN</i>    | NM_000314.6    | chr10 |
| <i>RAB3A</i>   | NM_002866.4    | chr19 |
| <i>RAC3</i>    | NM_001316307.1 | chr17 |
| <i>RIMS1</i>   | NM_001168407.1 | chr6  |
| <i>SLC32A1</i> | NM_080552.2    | chr20 |
| <i>SLC6A1</i>  | NM_003042.3    | chr3  |
| <i>SLC6A11</i> | NM_001317406.1 | chr3  |
| <i>SLC6A12</i> | NM_001122847.2 | chr12 |
| <i>SLC6A13</i> | NM_001190997.2 | chr12 |
| <i>SNAP25</i>  | NM_001322902.1 | chr20 |
| <i>STX1A</i>   | NM_001165903.1 | chr7  |
| <i>STXBP1</i>  | NM_001032221.3 | chr9  |

---

---

|             |                |       |
|-------------|----------------|-------|
| <i>SYN3</i> | NM_001135774.1 | chr22 |
|-------------|----------------|-------|

---

|             |                |       |
|-------------|----------------|-------|
| <i>SYT1</i> | NM_001135805.1 | chr12 |
|-------------|----------------|-------|

---

|             |             |      |
|-------------|-------------|------|
| <i>TAC1</i> | NM_003182.2 | chr7 |
|-------------|-------------|------|

---

|              |             |      |
|--------------|-------------|------|
| <i>TACR1</i> | NM_001058.3 | chr2 |
|--------------|-------------|------|

---

|              |                |      |
|--------------|----------------|------|
| <i>TRAK1</i> | NM_001042646.2 | chr3 |
|--------------|----------------|------|

---

|              |             |      |
|--------------|-------------|------|
| <i>TRAK2</i> | NM_015049.2 | chr2 |
|--------------|-------------|------|

---

|              |                |      |
|--------------|----------------|------|
| <i>USP46</i> | NM_001134223.1 | chr4 |
|--------------|----------------|------|

---

|              |             |       |
|--------------|-------------|-------|
| <i>VAMP2</i> | NM_014232.2 | chr17 |
|--------------|-------------|-------|

---

## Supplementary Figures

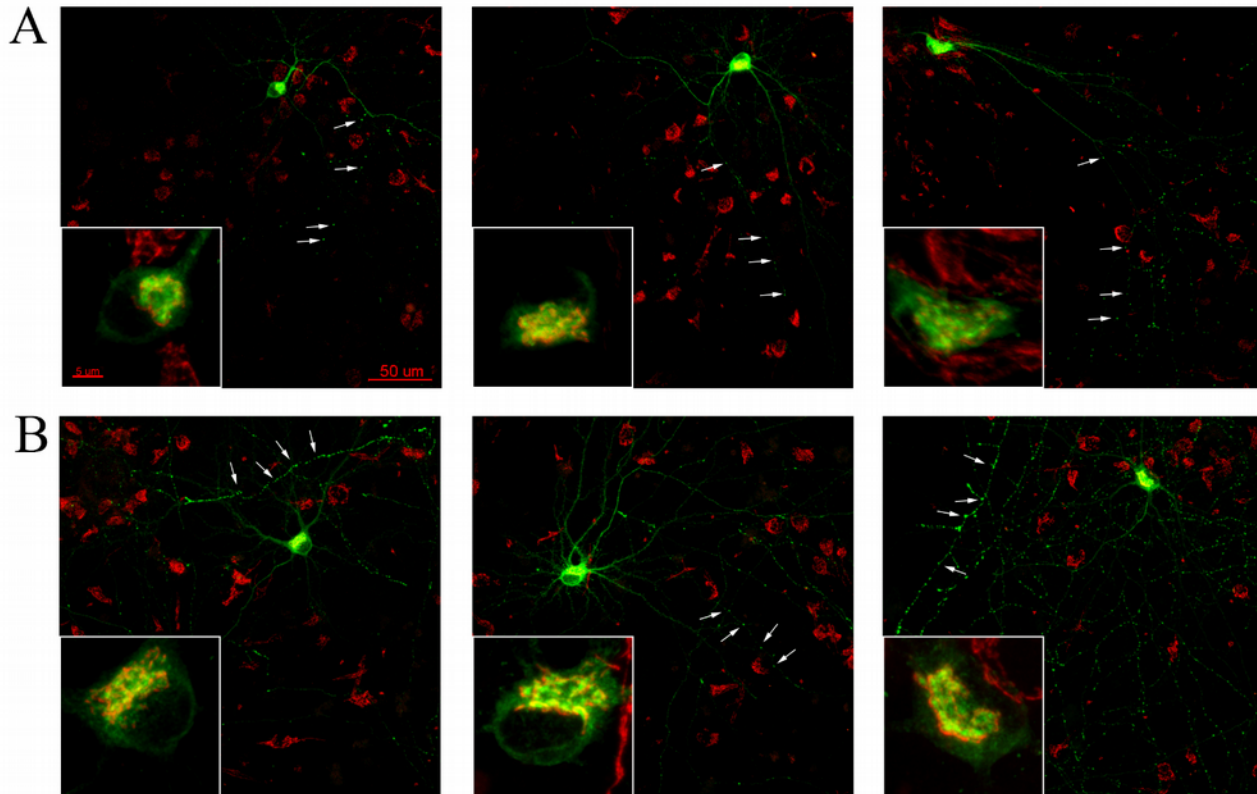

**Supplementary Figure 1.** Co-immunostaining of GAD67wt or GAD67mut (green signal) and Golgi Network marker GM130 (red signal) in transfected mice primary cortical neurons (scale mar 50 um). In the boxes, magnification of neuronal soma are reported showing the co-localization of GAD76 isoform and Golgi apparatus (scale bar 5 um). White arrows point to axonal clusterization of GAD67 wt and mut form. (A) representative neurons expressing GAD67wt; (B) Representative neurons expressing GAD67mut No difference in intracellular localization has been observed for GAD67wt and GAD67mut forms.

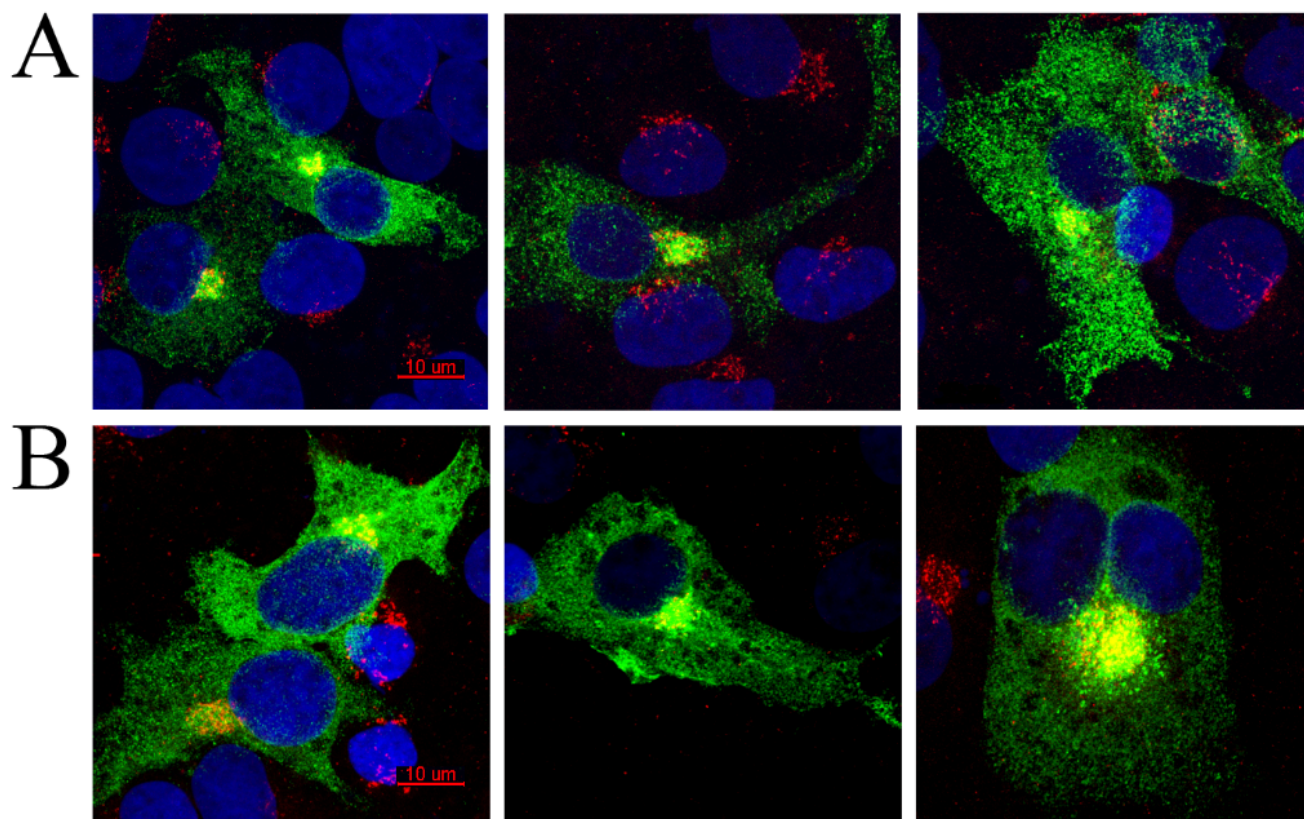

**Supplementary Figure 2.** Co-immunostaining of GAD67wt (A) or GAD67mut (B) (green) and Golgi Network GM130 marker (red) in transfected COS7 cells. Nuclei were stained using Dapi (blue). Scale bar = 10µm. (A) representative cells expressing GAD67wt; (B) Representative cells expressing GAD67mut. No difference in intracellular localization has been observed for GAD67wt and GAD67mut forms.



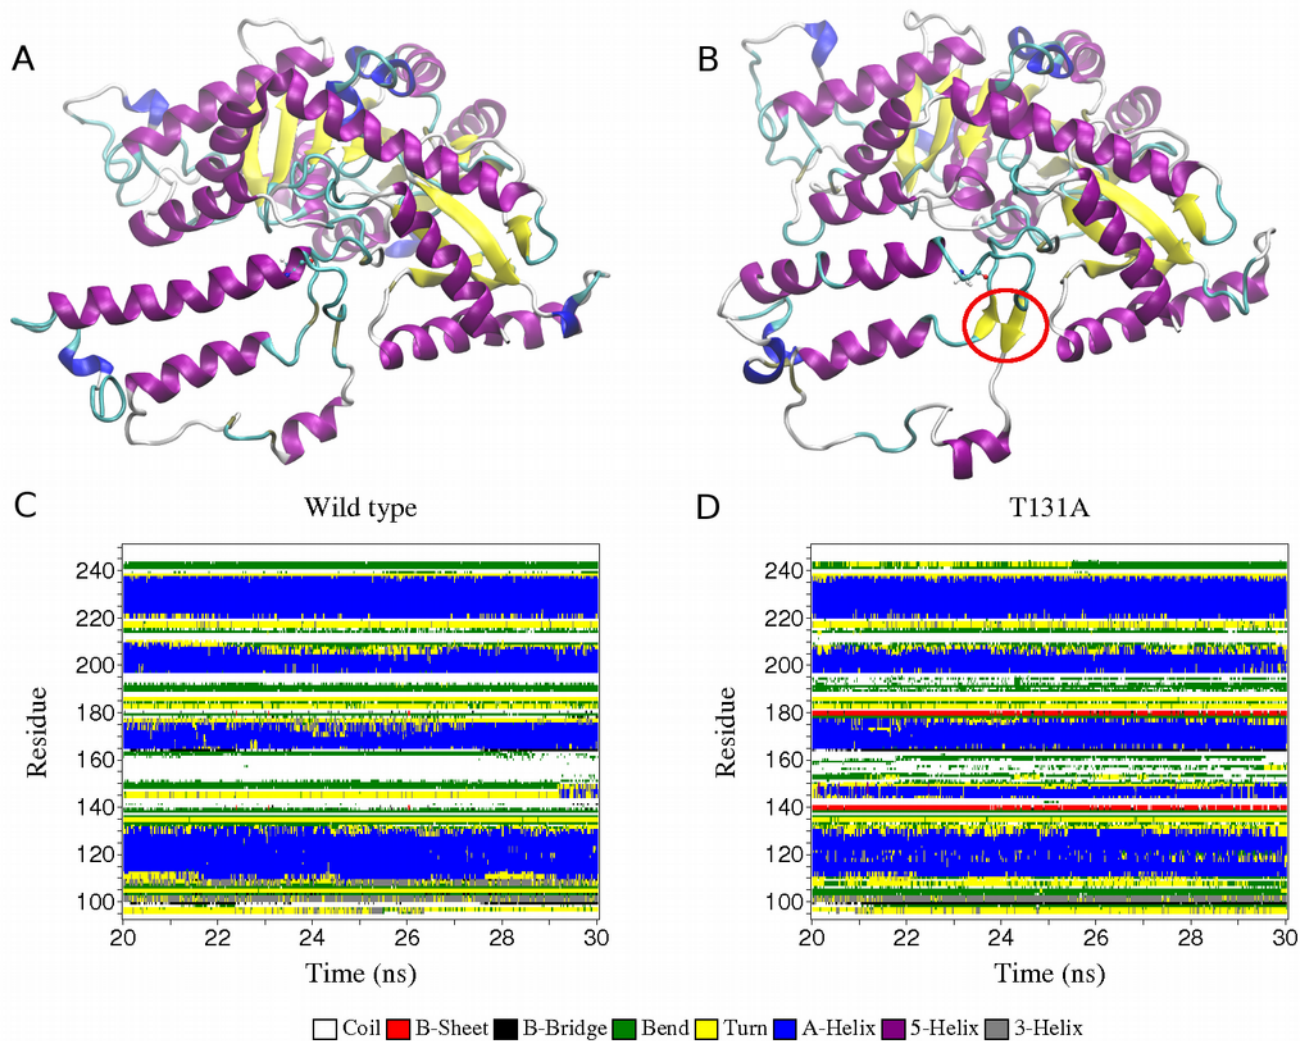

**Supplementary Figure 3.** Secondary structure of the wild-type and mutant monomer of GAD67 from molecular dynamics. (A) Structure of the wild-type monomer (image generated by VMD, <http://www.ks.uiuc.edu/Research/vmd/>). (B) Structure of the mutant monomer: a red circle shows a portion of  $\beta$ -sheet that is not present in the wild type. (C) Time evolution of the secondary structure of each residue of the wild type. (D) The same as C, for the mutant. The  $\beta$ -sheet component shown in panel B is represented here by the red lines around residues 140 and 180.

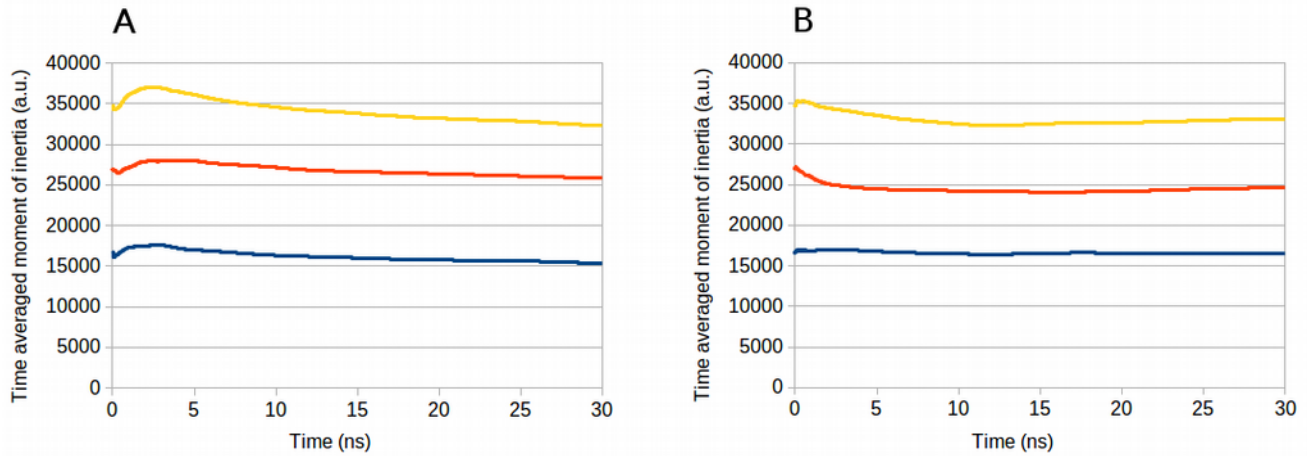

**Supplementary Figure 4.** Time average of the principal moments of inertia of the region including residues from 93 to 210, as calculated in molecular dynamics simulations of the wild type (panel A) and of the mutant (panel B). The ratios of the three values are different in the mutant with respect to the wild type, showing a change in the shape of this region.

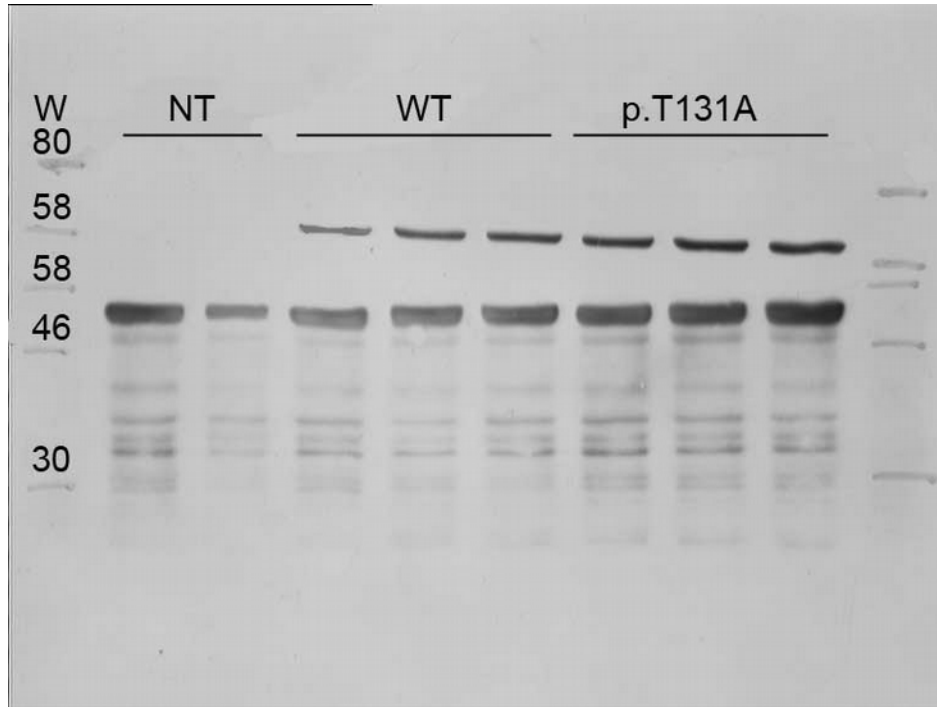

**Supplementary Figure 5.** Original image of Western-blot staining for GAD67 WT and mutated proteins. Cell extracts from un-transfected cells (NT), cells transfected with GAD67 WT construct (WT) and mutated construct (p.T131A) were subjected to 12% (w/v) SDS-PAGE and subsequently transferred by electroblotting onto Hybond-P blotting membrane (GE Life Sciences). Membranes were incubated with goat anti-GAD1 or anti- $\alpha$ Tub primary antibody and then with donkey anti-goat HRP-conjugated secondary antibody. Detection of immunocomplexes was carried out using SuperSignal West Pico Chemiluminescent Substrate detection kit (Thermo Scientific).
